# Supplementary material for: Beneficial effects of recombinant CER-001 high-density lipoprotein infusion in sepsis: results from a bench to bedside translational research project
Source: Springer Nature journal article supplement (doi:10.1186/s12916-023-03057-5), 2023-11-02

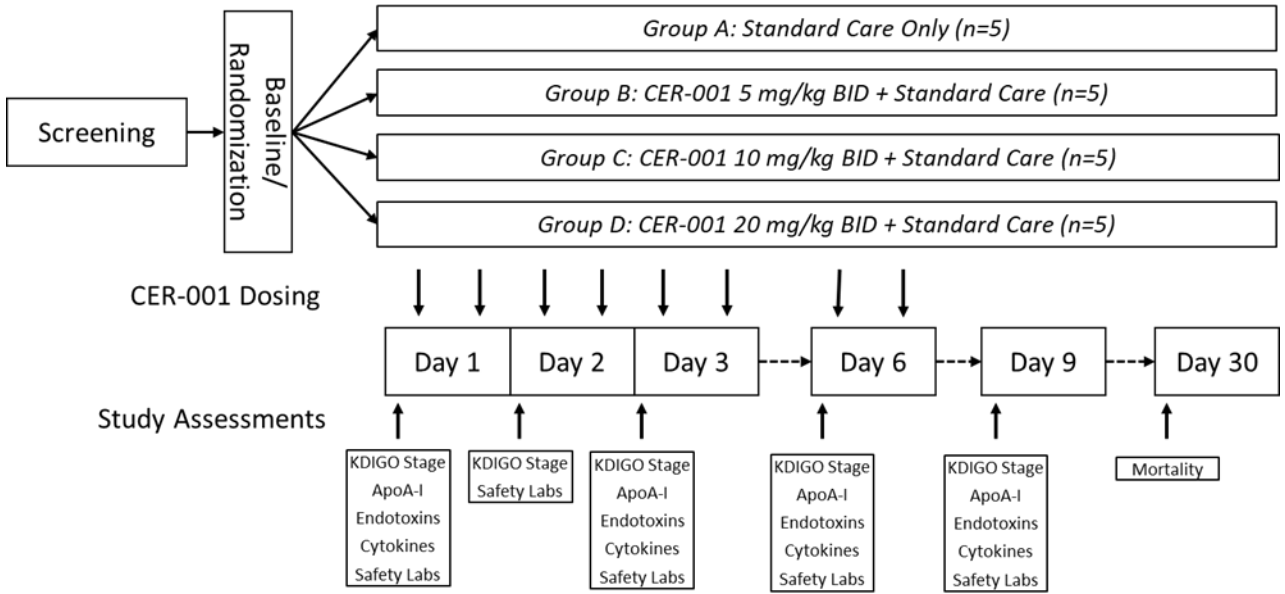

**A**

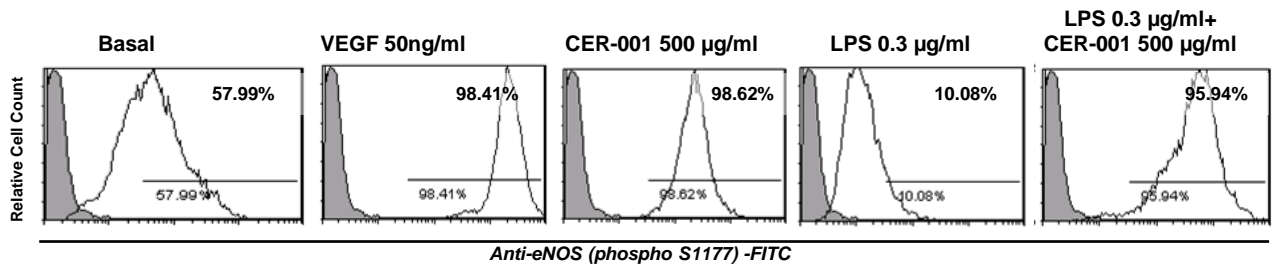

**B**

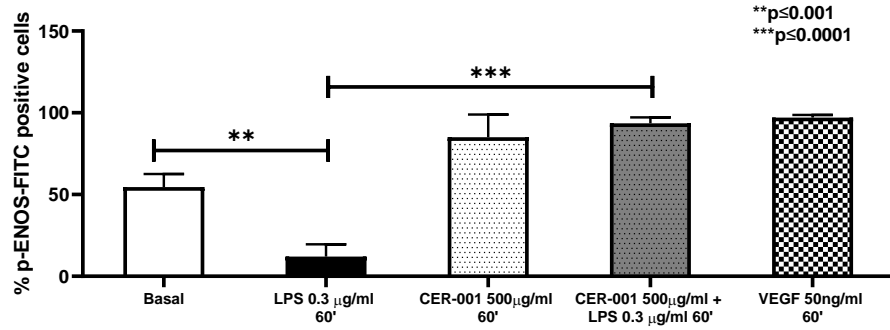

**C**

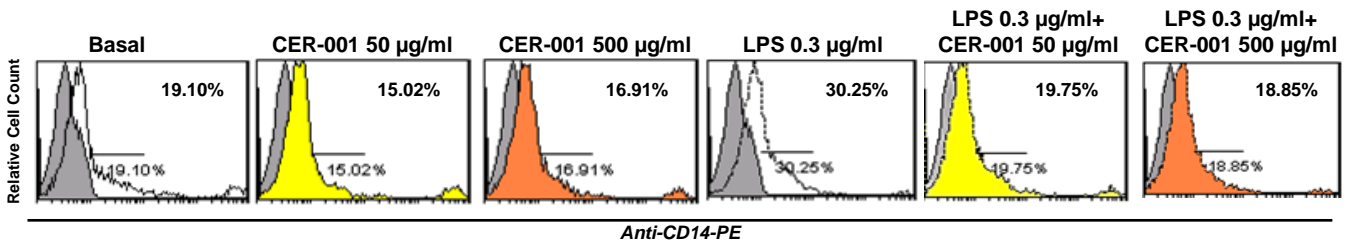

**D**

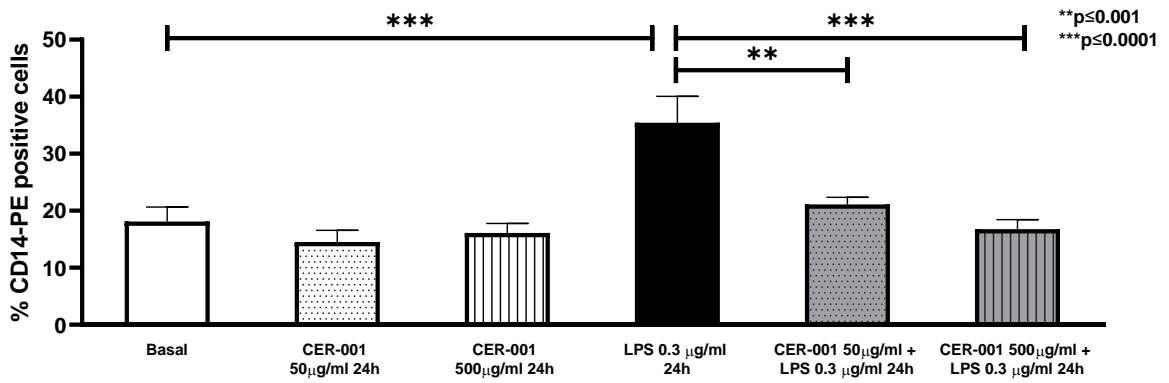

**E**

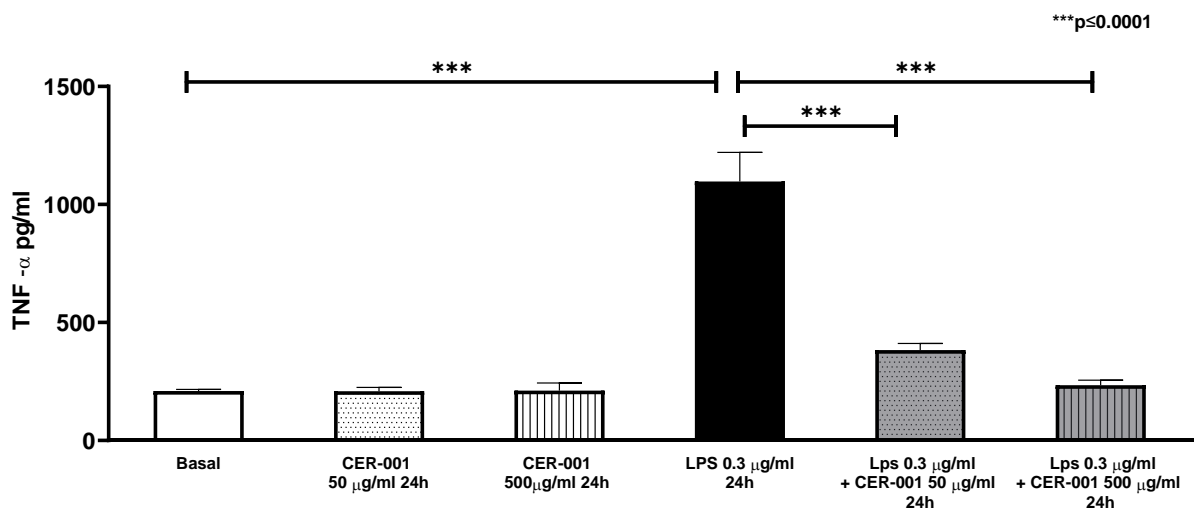

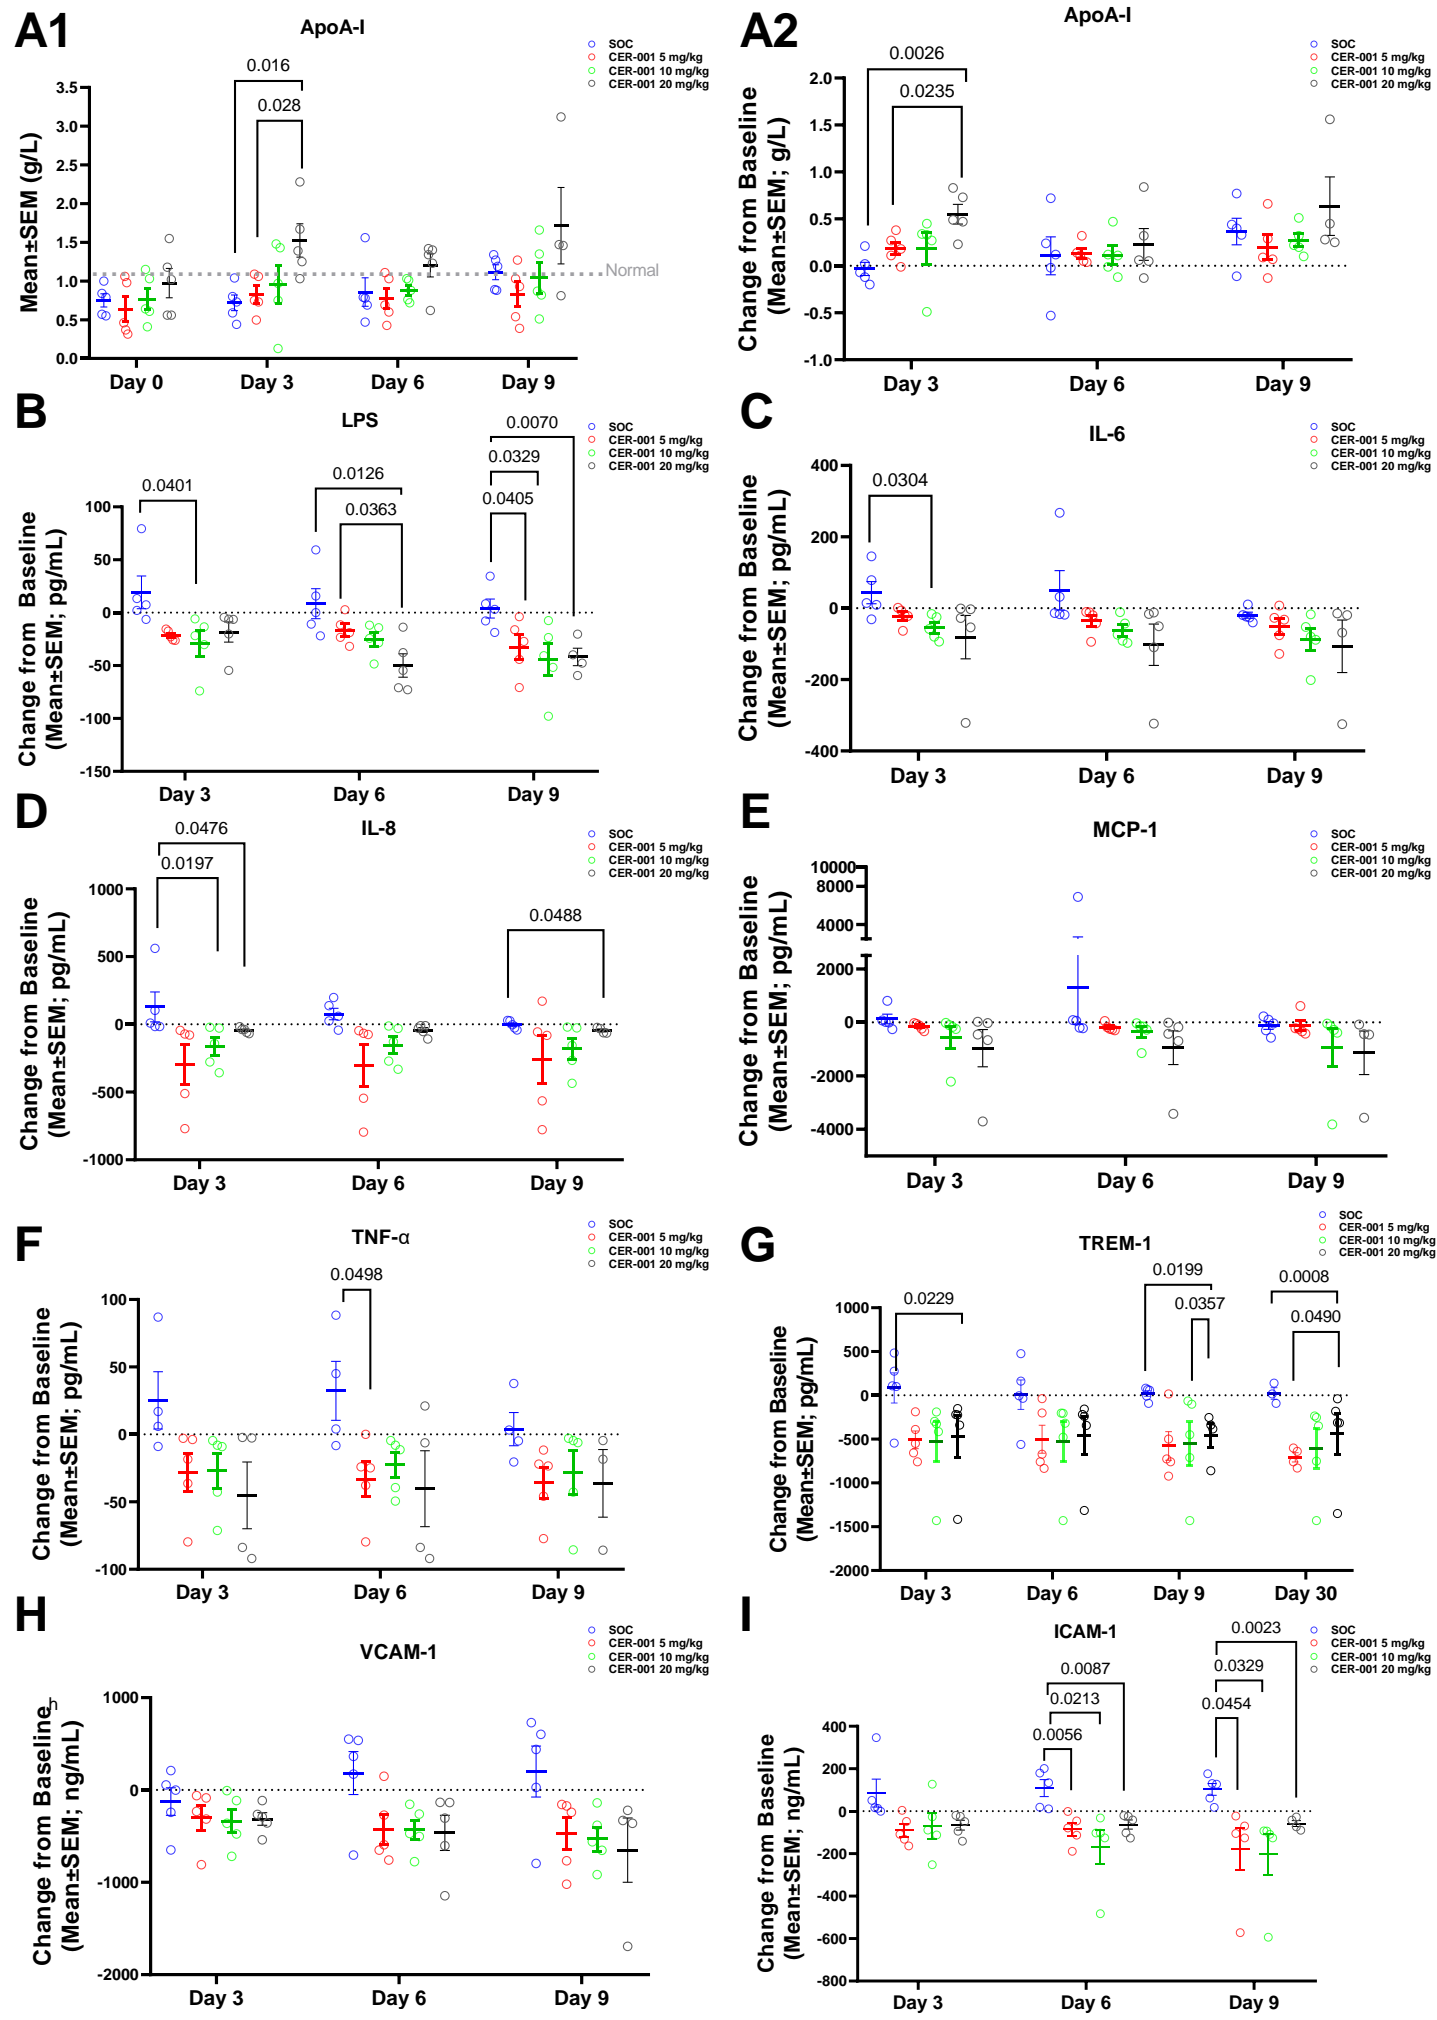

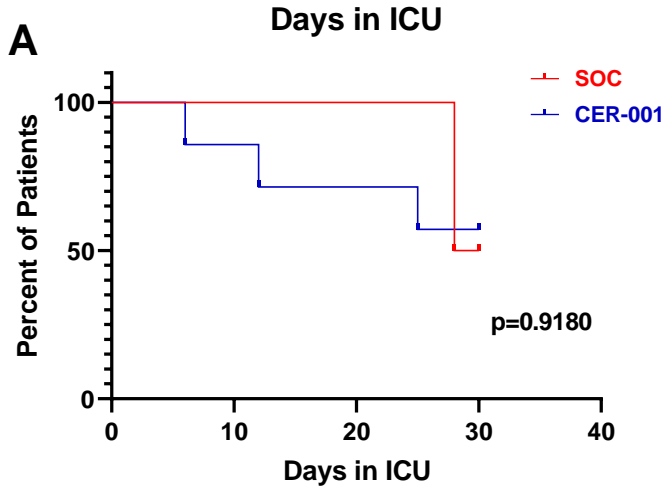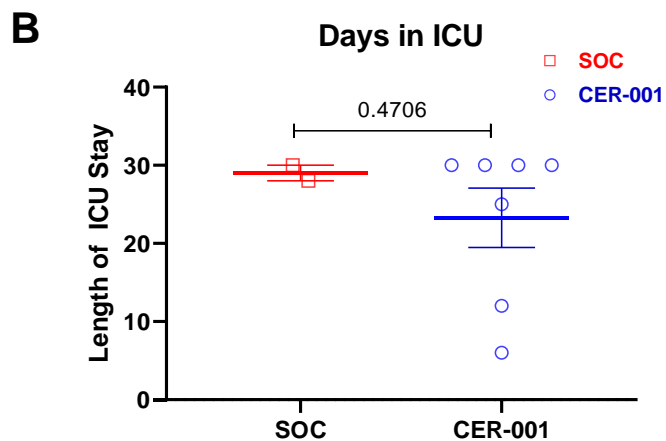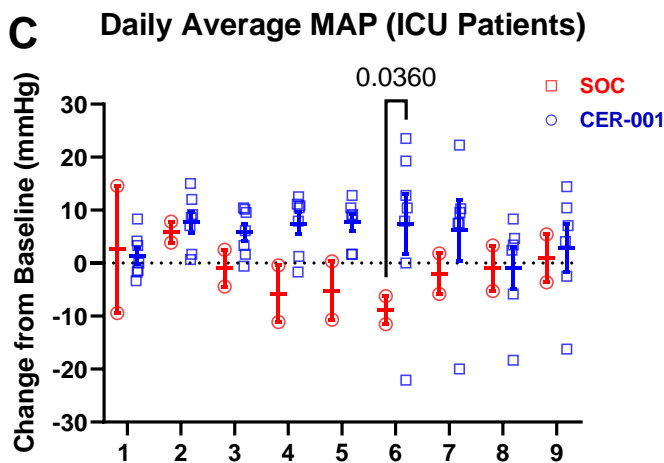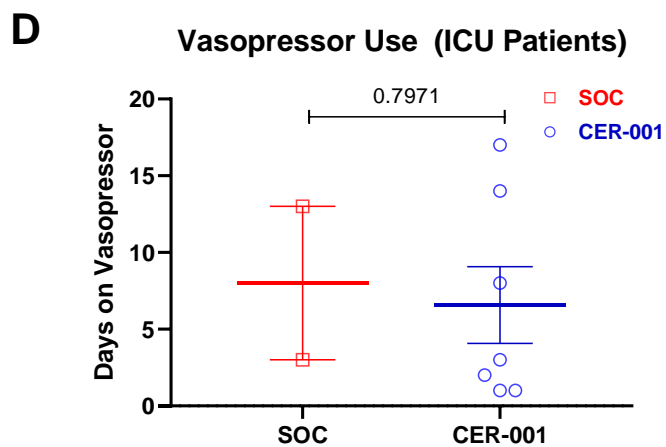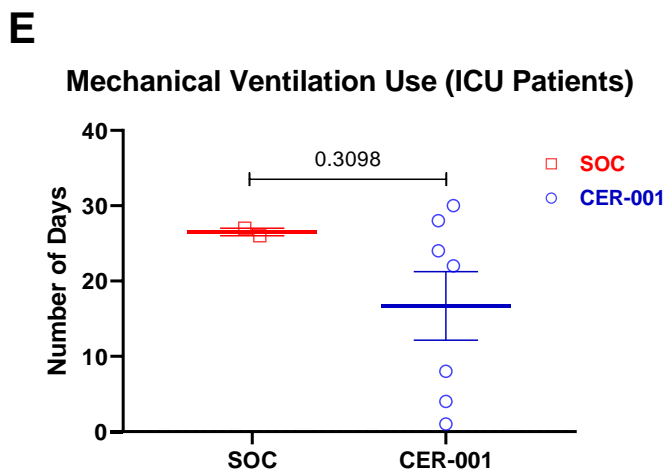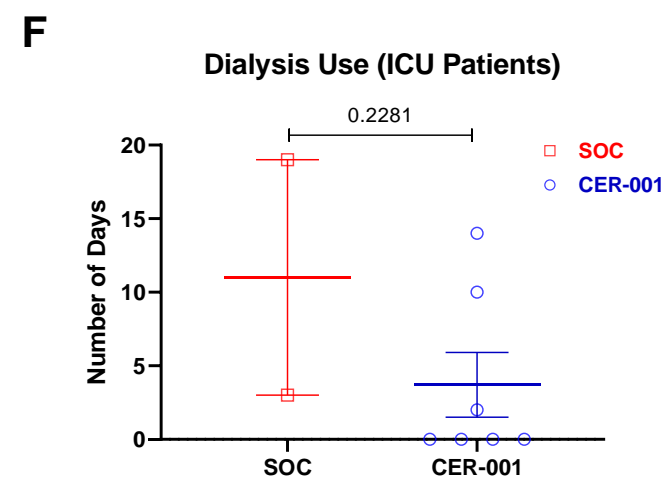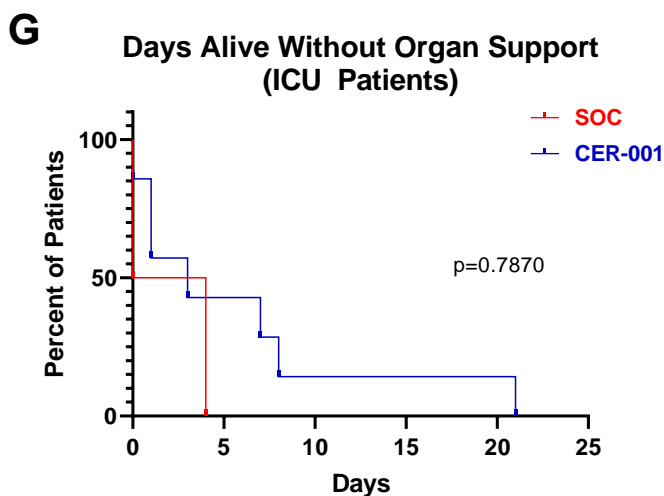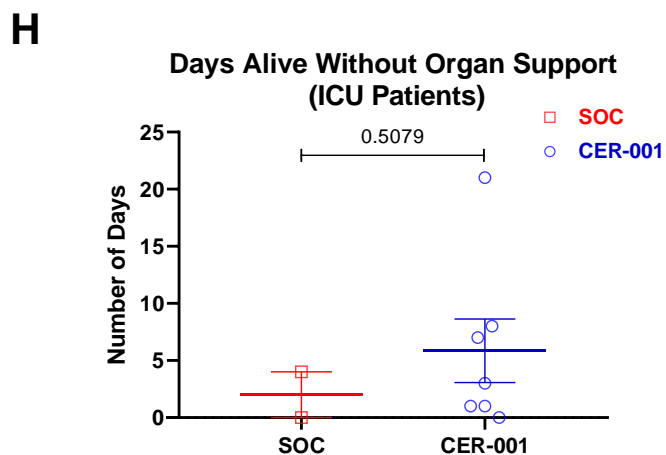

Supplement: MOESM2 [file 26256130]
