# Supplementary material for: Beneficial effects of recombinant CER-001 high-density lipoprotein infusion in sepsis: results from a bench to bedside translational research project
Source: Springer Nature journal article supplement (doi:10.1186/s12916-023-03057-5), 2023-11-02

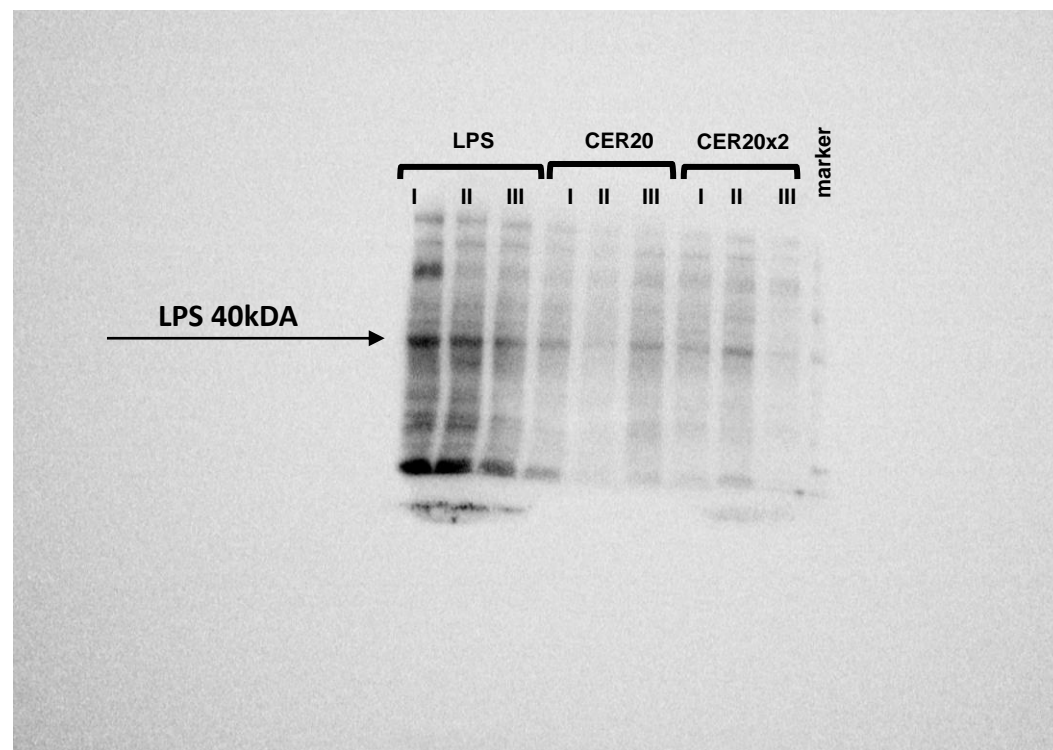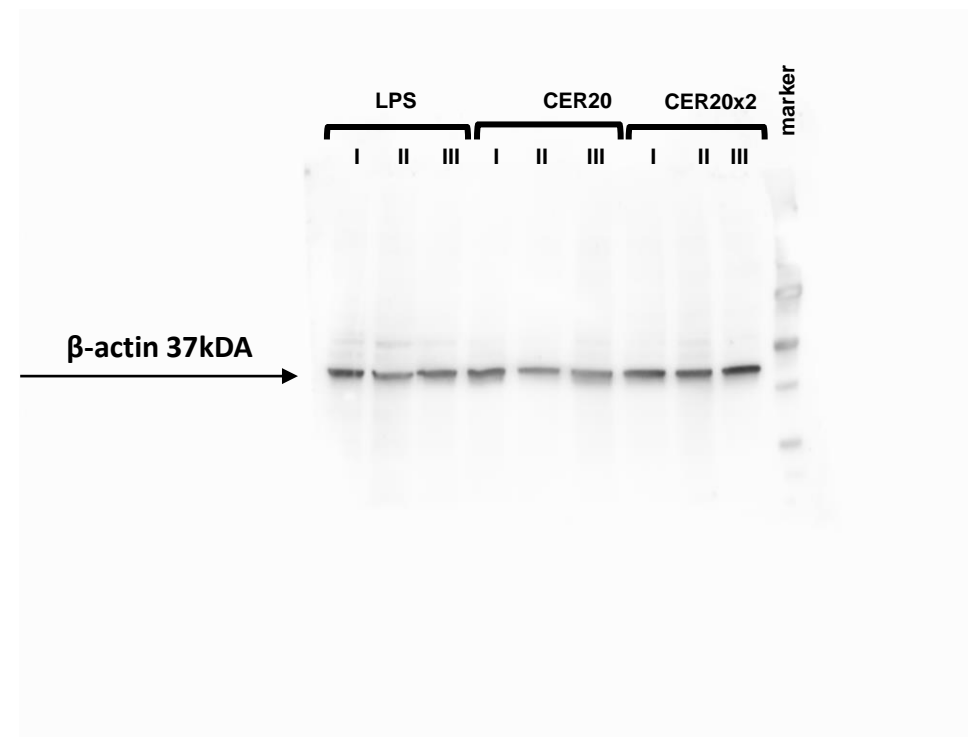

Supplement: MOESM5 [file 26256130]
